# Supplementary material
Source: PubMed Central journal article supplement (PMC5423544)
Supplement: NIHMS860504-supplement-10519_2017_9842_MOESM1_ESM.pdf [file NIHMS860504-supplement-10519_2017_9842_MOESM1_ESM.pdf]

## Supporting Information

### *R Script S1*

**GW-SEM.** The functions used to fit all of the functions described in the current paper are included in the attached R Script. The R script can be found at <http://www.people.vcu.edu/~bverhulst/GW-SEM/GW-SEM.R>.

### *Tutorial S2*

**GW-SEM Tutorial.** A step-by-step tutorial for all of the primary GW-SEM functions is provided at <http://www.people.vcu.edu/~bverhulst/GW-SEM/GW-SEM.html>. The tutorial includes links to download R, OpenMx, the necessary functions to run the models, example SNP and phenotype data, and completely worked through examples.
